# Supplementary material for: Strategic Approaches to Realize Sustainable Neighborhoods in Urban Renewal: A Case Study of Banan, Chongqing, China
Source: MDPI journal article supplement (doi:10.3390/su15043515), 2023-02-14
Supplement: s1 [file s1]

Table S1. The profile of the 13 interviewees

| ID         | Gender | Age | Qualification     | Years of Living in Banan | Occupation    |
|------------|--------|-----|-------------------|--------------------------|---------------|
| <i>I1</i>  | Male   | 35  | Vocational school | 26                       | Worker        |
| <i>I2</i>  | Female | 41  | High school       | 41                       | Self-employed |
| <i>I3</i>  | Female | 46  | High school       | 43                       | Unemployed    |
| <i>I4</i>  | Female | 32  | Vocational school | 20                       | Worker        |
| <i>I5</i>  | Male   | 33  | High school       | 30                       | Worker        |
| <i>I6</i>  | Male   | 35  | High school       | 35                       | Worker        |
| <i>I7</i>  | Male   | 51  | Vocational school | 25                       | Unemployed    |
| <i>I8</i>  | Female | 42  | High school       | 20                       | Worker        |
| <i>I9</i>  | Male   | 41  | University        | 37                       | Teacher       |
| <i>I10</i> | Female | 31  | University        | 31                       | Self-employed |
| <i>I11</i> | Male   | 39  | High school       | 30                       | Worker        |
| <i>I12</i> | Female | 37  | Vocational school | 13                       | Worker        |
| <i>I13</i> | Male   | 40  | University        | 15                       | Civil servant |

Table S2. A list of survey questions.

| Items                          |                                      | Survey Questions                                                                |
|--------------------------------|--------------------------------------|---------------------------------------------------------------------------------|
| <b>Positive Impacts</b>        |                                      |                                                                                 |
| Economic Sustainability        | Economic Prosperity                  | Banan's urban renewal leads to economic prosperity.                             |
|                                | Industrial Structure                 | Banan's urban renewal optimizes its industrial transformation.                  |
|                                | Employment                           | Banan's urban renewal creates a lot of job opportunities.                       |
| Social Sustainability          | Neighborhood Security                | Banan's urban renewal makes our neighborhood much safer than before.            |
|                                | Facilitated Transportation           | Banan's urban renewal brings facilitated transportation.                        |
|                                | Modernized Life                      | Banan's urban renewal brings modernized neighborhood life.                      |
| Environmental Sustainability   | Reduction of Household Wastes        | Banan's urban renewal reduces household wastes                                  |
|                                | Green Space                          | Banan's urban renewal creates more green space                                  |
|                                | Landscape                            | Banan's urban renewal improves its urban landscape.                             |
| <b>Negative Impacts</b>        |                                      |                                                                                 |
| Economic Unsustainability      | Unsustainable Growth                 | The prosperity cannot sustain in the long-term.                                 |
|                                | Sluggish Income Growth               | My income growth is lagged behind the economic growth of Banan.                 |
|                                | Economic Inequality                  | The gap between rich and poor is enlarged by Banan's urban renewal.             |
| Social Unsustainability        | Weakened Neighborhood Relationships  | Banan's urban renewal weakens neighborhood relationships.                       |
|                                | Deterioration of Traditional Culture | Banan's traditional culture is deteriorated by its urban renewal.               |
|                                | Excessive Commercialization          | Banan's urban renewal leads to excessive commercialization of our neighborhood. |
| Environmental Unsustainability | Monotonicity                         | Banan's urban renewal leads to the monotonous urban landscape.                  |
|                                | Crowdedness                          | Banan's urban renewal leads to the crowded urban environment.                   |
|                                | Stressful Environment                | Banan's urban renewal leads to the stressful urban environment.                 |
