# Supplementary material for: Strategic Approaches to Realize Sustainable Neighborhoods in Urban Renewal: A Case Study of Banan, Chongqing, China
Source: MDPI journal article supplement (doi:10.3390/su15043515), 2023-02-14
Supplement: s1 [file s1]

Archive with 1 entries (1 files):
- sustainability-2163658-supplementary.pdf
